# Supplementary material for: [FeFe]-Hydrogenase Abundance and Diversity along a Vertical Redox Gradient in Great Salt Lake, USA
Source: MDPI journal article supplement (doi:10.3390/ijms151221947), 2014-11-28
Supplement: s1 [file s1]

## Sheet:  Table S1
Table S1. Frequency and NCBI reference identifiers for hydA clones recovered from the GSL DWR3 water column. The closest reference sequence, its percent identities and similarites to this HydA sequence, and its taxonomic class and phylum, as determined by BLASTp analysis, are indicated. In addition, the inferred structural class (see Figs. 4 and 5) based on phylogenetic analysis is indicated.
Depth	Representative Sequence a	Frequence b	Percnets of Total (%)	Closest Cultivated Organism (BLASTp) c	Id (%) c	Sim (%) c	Class c	Phylum c	Putative Structural Class d
6	1_1 (HM636647)	1	1.72414	Opitutus terrae PB90-1 (ACB74828.1)	63	80	Opitutae	Verrucomicrobia	TRM3
6	1_3 (HM636648)	1	1.72414	Symbiobacterium thermophilum IAM 14863 (YP_077035.1)	61	76	Clostridia	Firmicutes	TRM3
6	1_6 (HM636649)	1	1.72414	Candidatus Desulforudis audaxviator MP104C (YP_001716352)	65	77	Clostridia	Firmicutes	TRM3
6	1_7 (HM636650)	1	1.72414	Moorella thermoacetica ATCC 39073 (YP_430562.1)	63	76	Clostridia	Firmicutes	TRM3
6	1_9 (HM636651)	1	1.72414	Thermotoga lettingae TMO (YP_001470971.1)	70	82	Thermotogae	Thermotogae	ThermM
6	1_14 (HM636652)	4	6.89655	Pelotomaculum thermopropionicum SI (YP_001212560.1)	57	75	Clostridia	Firmicutes	TRM3
6	1_15 (HM636653)	9	15.5172	Symbiobacterium thermophilum IAM 14863 (YP_077035.1)	61	76	Clostridia	Firmicutes	TRM3
6	1_16 (HM636654)	1	1.72414	Thermoanaerobacterium saccharolyticum (ACA51661.1)	58	77	Clostridia	Firmicutes	???
6	1_17 (HM636655)	2	3.44828	Moorella thermoacetica ATCC 39073 (ABC20019.1)	63	79	Clostridia	Firmicutes	TRM3
6	1_20 (HM636656)	6	10.3448	Moorella thermoacetica ATCC 39073 (ABC20019.1)	63	77	Clostridia	Firmicutes	TRM3
6	1_22 (HM636657)	1	1.72414	Opitutus terrae PB90-1 (ACB74828.1)	56	75	Opitutae	Verrucomicrobia	TRM3
6	1_26 (HM636658)	1	1.72414	Ammonifex degensii KC4 (YP_003239721.1)	62	76	Clostridia	Firmicutes	TRM3
6	1_27 (HM636659)	3	5.17241	Bacteroides sp. 2_2_4 (ZP_04552912.1)	72	86	Bacteroidia	Bacteroidetes	TRM3
6	1_28 (HM636660)	1	1.72414	Moorella thermoacetica ATCC 39073 (ABC20019.1)	64	77	Clostridia	Firmicutes	TRM3
6	1_32 (HM636661)	1	1.72414	Tolumonas auensis TA 4, DSM 9187 (YP_002892704.1)	67	84	γ-Proteobacteria	Proteobacteria	TRM3
6	1_33 (HM636662)	1	1.72414	Moorella thermoacetica ATCC 39073 (YP_430562.1)	64	78	Clostridia	Firmicutes	TRM3
6	1_34 (HM636663)	1	1.72414	Symbiobacterium thermophilum IAM 14863 (YP_077035.1)	65	77	Clostridia	Firmicutes	TRM3
6	1_35 (HM636664)	1	1.72414	Halothermothrix orenii H 168 (YP_002508054)	69	86	Clostridia	Firmicutes	TRM3
6	1_37 (HM636665)	2	3.44828	Symbiobacterium thermophilum IAM 14863 (YP_077035.1)	61	76	Clostridia	Firmicutes	TRM3
6	1_39 (HM636666)	1	1.72414	Ammonifex degensii KC4 (YP_003239721.1)	63	77	Clostridia	Firmicutes	TRM3
6	1_40 (HM636667)	1	1.72414	Moorella thermoacetica ATCC 39073 (YP_430562)	66	79	Clostridia	Firmicutes	TRM3
6	1_41 (HM636668)	1	1.72414	Elusimicrobium minutum Pei191 (YP_001875425)	56	76	Elusimicrobia	Elusimicrobia	TRM3
6	1_43 (HM636669)	1	1.72414	Opitutus terrae PB90-1 (YP_001818428)	58	72	Opitutae	Verrucomicrobia	TRM3
6	1_44 (HM636670)	1	1.72414	Opitutus terrae PB90-1 (YP_001818428)	59	73	Opitutae	Verrucomicrobia	TRM3
6	1_45 (HM636671)	1	1.72414	Opitutus terrae PB90-1 (YP_001818428)	58	74	Opitutae	Verrucomicrobia	TRM3
6	1_46 (HM636672)	3	5.17241	Thermanaerovibrio acidaminovorans DSM 6589 (ZP_04467899)	70	85	Synetgista	Synergistetes	TRM3
6	1_47 (HM636673)	1	1.72414	Moorella thermoacetica ATCC 39073 (YP_430562)	63	78	Clostridia	Firmicutes	TRM3
6	1_60 (HM636674)	1	1.72414	Symbiobacterium thermophilum IAM 14863 (YP_077035)	61	76	Clostridia	Firmicutes	TRM3
6	1_65 (HM636675)	1	1.72414	Moorella thermoacetica ATCC 39073 (YP_430562)	65	78	Clostridia	Firmicutes	TRM3
6	1_66 (HM636676)	1	1.72414	Ammonifex degensii KC4 (YP_003239721.1)	62	79	Clostridia	Firmicutes	TRM3
6	1_67 (HM636677)	1	1.72414	Candidatus Desulforudis audaxviator MP104C (YP_001716352.1)	66	77	Clostridia	Firmicutes	TRM3
6	1_68 (HM636678)	1	1.72414	Ammonifex degensii KC4 (YP_003239721.1)	66	75	Clostridia	Firmicutes	TRM3
6	1_69 (HM636679)	1	1.72414	Moorella thermoacetica ATCC 39073 (YP_430562.1)	71	86	Clostridia	Firmicutes	TRM3
6	1_70 (HM636680)	1	1.72414	Candidatus Desulforudis audaxviator MP104C (YP_001716352.1)	60	78	Clostridia	Firmicutes	???
6	1_71 (HM636681)	1	1.72414	Symbiobacterium thermophilum IAM 14863 (YP_077035.1)	62	76	Clostridia	Firmicutes	TRM3
6	1_74 (HM636682)	1	1.72414	Thermanaerovibrio acidaminovorans DSM 6589 (ZP_04467899.1)	69	83	Synetgista	Synergistetes	TRM3
6.5	2_4 (HM636683)	1	1.78571	Opitutus terrae PB90-1 (YP_001818428.1)	58	73	Opitutae	Verrucomicrobia	TRM3
6.5	2_7 (HM636684)	1	1.78571	Tolumonas auensis DSM 9187 (YP_002892704.1)	58	80	γ-Proteobacteria	Proteobacteria	TRM3
6.5	2_8 (HM636685)	1	1.78571	Bacteroides sp. D20 (ZP_06203245.1)	75	86	Bacteroidia	Bacteroidetes	TRM3
6.5	2_12 (HM636686)	1	1.78571	Desulfotomaculum acetoxidans DSM 771 (YP_003189750.1)	63	75	Clostridia	Firmicutes	TRM3
6.5	2_13 (HM636687)	1	1.78571	Halothermothrix orenii H 168 (YP_002508054.1)	69	87	Clostridia	Firmicutes	TRM3
6.5	2_14 (HM636688)	6	10.7143	Thermanaerovibrio acidaminovorans DSM 6589 (YP_003316672.1)	69	84	Synetgista	Synergistetes	TRM3
6.5	2_15 (HM636689)	1	1.78571	Thermanaerovibrio acidaminovorans DSM 6589 (YP_003316672.1)	69	85	Synetgista	Synergistetes	TRM3
6.5	2_16 (HM636690)	7	12.5	Symbiobacterium thermophilum IAM 14863 (YP_077035.1)	61	76	Clostridia	Firmicutes	TRM3
6.5	2_18 (HM636691)	1	1.78571	Halothermothrix orenii H 168 (YP_002508054.1)	72	89	Clostridia	Firmicutes	TRM3
6.5	2_26 (HM636692)	1	1.78571	Bacteroides sp. D20 (ZP_06203245.1)	61	83	Bacteroidia	Bacteroidetes	TRM3
6.5	2_28 (HM636693)	1	1.78571	Halothermothrix orenii H 168 (YP_002508054.1)	70	88	Clostridia	Firmicutes	TRM3
6.5	2_31 (HM636694)	1	1.78571	Symbiobacterium thermophilum IAM 14863 (YP_077035.1)	65	77	Clostridia	Firmicutes	TRM3
6.5	2_35 (HM636695)	1	1.78571	Clostridium cellulolyticum H10 (YP_002506554.1)	59	77	Clostridia	Firmicutes	TRM3
6.5	2_38 (HM636696)	1	1.78571	Thermanaerovibrio acidaminovorans DSM 6589 (YP_003316672.1)	68	80	Synetgista	Synergistetes	TRM3
6.5	2_43 (HM636697)	1	1.78571	Symbiobacterium thermophilum IAM 14863 (YP_077035.1)	64	77	Clostridia	Firmicutes	TRM3
6.5	2_47 (HM636698)	1	1.78571	Clostridium cellulolyticum H10 (YP_002506554.1)	58	76	Clostridia	Firmicutes	TRM3
6.5	2_48 (HM636699)	1	1.78571	Clostridium thermocellum DSM 2360 (ZP_05430688.1)	66	76	Clostridia	Firmicutes	TRM3
6.5	2_52 (HM636700)	1	1.78571	Opitutus terrae PB90-1 (YP_001818428.1)	58	80	Opitutae	Verrucomicrobia	TRM3
6.5	2_55 (HM636701)	1	1.78571	Symbiobacterium thermophilum IAM 14863 (YP_077035.1)	65	77	Clostridia	Firmicutes	TRM3
6.5	2_59 (HM636702)	1	1.78571	Bacteroides sp. 2_2_4 (ZP_04552912.1)	71	86	Bacteroidia	Bacteroidetes	TRM3
6.5	2_63 (HM636703)	1	1.78571	Thermanaerovibrio acidaminovorans DSM 6589 (YP_003316672.1)	68	84	Synetgista	Synergistetes	TRM3
6.5	2_129 (HM636704)	2	3.57143	Symbiobacterium thermophilum IAM 14863 (YP_077035.1)	63	76	Clostridia	Firmicutes	TRM3
6.5	2_138 (HM636705)	1	1.78571	Anaerococcus hydrogenalis DSM 7454 (ZP_03305079.1)	57	70	Clostridia	Firmicutes	TRM3
6.5	2_140 (HM636706)	1	1.78571	Syntrophomonas wolfei subsp. wolfei str. Goettingen (YP_753702.1)	63	77	δ-Proteobacteria	Proteobacteria	TRM3
6.5	2_144 (HM636707)	1	1.78571	Tolumonas auensis DSM 9187 (YP_002892704.1)	59	82	γ-Proteobacteria	Proteobacteria	TRM3
6.5	2_151 (HM636708)	1	1.78571	Pelotomaculum thermopropionicum SI (YP_001211927)	58	76	Clostridia	Firmicutes	TRM3
6.5	2_159 (HM636709)	1	1.78571	Pelotomaculum thermopropionicum SI (YP_001211927)	57	75	Clostridia	Firmicutes	TRM3
6.5	2_166 (HM636710)	1	1.78571	Moorella thermoacetica ATCC 39073 (YP_430562.1)	56	73	Clostridia	Firmicutes	???
6.5	2_168 (HM636711)	1	1.78571	Bacteroides thetaiotaomicron VPI-5482 NP_809037.1)	76	86	Bacteroidia	Bacteroidetes	TRM3
6.5	2_169 (HM636712)	1	1.78571	Pelotomaculum thermopropionicum SI (YP_001211927)	57	75	Clostridia	Firmicutes	TRM3
6.5	2_170 (HM636713)	1	1.78571	Bacteroides intestinalis DSM 17393 (ZP_03015926.1)	71	86	Bacteroidia	Bacteroidetes	TRM3
6.5	2_171 (HM636714)	1	1.78571	Tolumonas auensis DSM 9187 (YP_002892704.1)	59	80	γ-Proteobacteria	Proteobacteria	TRM3
6.5	2_174 (HM636715)	2	3.57143	Moorella thermoacetica ATCC 39073 (YP_430562.1)	67	87	Clostridia	Firmicutes	TRM3
6.5	2_175 (HM636716)	2	3.57143	Opitutus terrae PB90-1 (YP_001818428.1)	68	81	Opitutae	Verrucomicrobia	TRM3
6.5	2_177 (HM636717)	1	1.78571	Tolumonas auensis DSM 9187 (YP_002892704.1)	58	80	γ-Proteobacteria	Proteobacteria	TRM3
6.5	2_178 (HM636718)	1	1.78571	Moorella thermoacetica ATCC 39073 (YP_430562.1)	56	73	Clostridia	Firmicutes	TRM3
6.5	2_180 (HM636719)	1	1.78571	Thermanaerovibrio acidaminovorans DSM 6589 (ZP_04467899.1)	68	83	Synetgista	Synergistetes	TRM3
6.5	2_181 (HM636720)	1	1.78571	Pelotomaculum thermopropionicum SI (YP_001212560.1)	59	77	Clostridia	Firmicutes	TRM3
6.5	2_187 (HM636721)	1	1.78571	Desulfotomaculum acetoxidans DSM 771 (YP_003189750.1)	58	68	Clostridia	Firmicutes	TRM3
6.5	2_189 (HM636722)	2	3.57143	Thermanaerovibrio acidaminovorans DSM 6589 (ZP_04467899.1)	70	82	Synetgista	Synergistetes	TRM3
8	3_1 (HM636723)	1	1.72414	Thermotoga lettingae TMO (YP_001470971.1)	70	82	Thermotogae	Thermotogae	ThermM
8	3_2 (HM636724)	1	1.72414	Moorella thermoacetica ATCC (YP_430562.1)	63	74	Clostridia	Firmicutes	TRM3
8	3_3 (HM636725)	1	1.72414	Halothermothrix orenii H 168 (YP_002508054.1)	73	87	Clostridia	Firmicutes	TRM3
8	3_11 (HM636726)	1	1.72414	Pelotomaculum thermopropionicum SI (YP_001211927.1)	56	74	Clostridia	Firmicutes	TRM3
8	3_14 (HM636727)	1	1.72414	Pelotomaculum thermopropionicum SI (YP_001211927.1)	57	76	Clostridia	Firmicutes	TRM3
8	3_25 (HM636728)	2	3.44828	Thermanaerovibrio acidaminovorans DSM 6589 (YP_003316672.1)	69	85	Synetgista	Synergistetes	TRM3
8	3_26 (HM636729)	7	12.069	Pelotomaculum thermopropionicum SI (YP_001211927.1)	58	76	Clostridia	Firmicutes	TRM3
8	3_27 (HM636730)	1	1.72414	Syntrophus aciditrophicus SB (YP_461142.1)	63	76	δ-Proteobacteria	Proteobacteria	TRM3
8	3_29 (HM636731)	2	3.44828	Opitutus terrae PB90-1 (YP_001818428.1)	68	81	Opitutae	Verrucomicrobia	TRM3
8	3_30 (HM636732)	5	8.62069	Thermanaerovibrio acidaminovorans DSM 6589 (YP_003316672.1)	69	84	Synetgista	Synergistetes	TRM3
8	3_31 (HM636733)	1	1.72414	Pelotomaculum thermopropionicum SI (YP_001211927.1)	58	76	Clostridia	Firmicutes	TRM3
8	3_32 (HM636734)	3	5.17241	Bacteroides thetaiotaomicron VPI-5482 (NP_809037.1)	76	86	Bacteroidia	Bacteroidetes	TRM3
8	3_34 (HM636735)	1	1.72414	Symbiobacterium thermophilum IAM 14863 (YP_077035.1)	63	76	Clostridia	Firmicutes	TRM3
8	3_36 (HM636736)	1	1.72414	Thermanaerovibrio acidaminovorans DSM 6589 (YP_003316672.1)	69	83	Synetgista	Synergistetes	TRM3
8	3_37 (HM636737)	1	1.72414	Tolumonas auensis DSM 9187 (YP_002892704.1)	68	86	γ-Proteobacteria	Proteobacteria	TRM3
8	3_38 (HM636738)	2	3.44828	Clostridium thermocellum ATCC 27405 (YP_001036773.1)	64	79	Clostridia	Firmicutes	???
8	3_39 (HM636739)	1	1.72414	Elusimicrobium minutum Pei191 (YP_001875425.1)	63	80	Elusimicrobia	Elusimicrobia	TRM3
8	3_40 (HM636740)	3	5.17241	Symbiobacterium thermophilum IAM 14863 (YP_077035.1)	61	76	Clostridia	Firmicutes	TRM3
8	3_41 (HM636741)	1	1.72414	Opitutus terrae PB90-1 (YP_001818428.1)	68	81	Opitutae	Verrucomicrobia	TRM3
8	3_43 (HM636742)	1	1.72414	Syntrophus aciditrophicus SB (YP_461142.1)	66	82	δ-Proteobacteria	Proteobacteria	TRM3
8	3_45 (HM636743)	1	1.72414	Thermoanaerobacterium thermosaccharolyticum DSM 571 (ZP_05335458.1)	57	72	Clostridia	Firmicutes	TRM3
8	3_46 (HM636744)	2	3.44828	Thermanaerovibrio acidaminovorans DSM 6589 (YP_003316672.1)	69	85	Synetgista	Synergistetes	TRM3
8	3_63 (HM636745)	1	1.72414	Thermanaerovibrio acidaminovorans DSM 6589 (YP_003316672.1)	69	85	Synetgista	Synergistetes	TRM3
8	3_65 (HM636746)	1	1.72414	Moorella thermoacetica ATCC 39073 (YP_430562.1)	56	73	Clostridia	Firmicutes	???
8	3_68 (HM636747)	1	1.72414	Moorella thermoacetica ATCC 39073 (YP_430562.1)	61	74	Clostridia	Firmicutes	TRM3
8	3_73 (HM636748)	2	3.44828	Clostridium thermocellum ATCC 27405 (YP_001036773.1)	59	77	Clostridia	Firmicutes	???
8	3_74 (HM636749)	1	1.72414	Thermanaerovibrio acidaminovorans DSM 6589 (YP_00331)6672.1	69	85	Synetgista	Synergistetes	TRM3
8	3_75 (HM636750)	1	1.72414	Symbiobacterium thermophilum IAM 14863 (YP_077035.1)	61	76	Clostridia	Firmicutes	TRM3
8	3_76 (HM636751)	1	1.72414	Opitutus terrae PB90-1 (ACB74828.1)	75	86	Opitutae	Verrucomicrobia	TRM3
8	3_77 (HM636752)	1	1.72414	Opitutus terrae PB90-1 (ACB74828.1)	74	87	Opitutae	Verrucomicrobia	TRM3
8	3_79 (HM636753)	1	1.72414	Pelotomaculum thermopropionicum SI (YP_001212560.1)	64	77	Clostridia	Firmicutes	TRM3
8	3_82 (HM636754)	1	1.72414	Opitutus terrae PB90-1 (ACB74828.1)	69	82	Opitutae	Verrucomicrobia	TRM3
8	3_84 (HM636755)	2	3.44828	Moorella thermoacetica ATCC 39073 (ABC20019.1)	63	78	Clostridia	Firmicutes	TRM3
Benthic	4_3 (HM636756)	1	1.66667	Pelotomaculum thermopropionicum SI (YP_001212560.1)	57	75	Clostridia	Firmicutes	TRM3
Benthic	4_4 (HM636757)	1	1.66667	Ammonifex degensii KC4 (YP_003239721.1)	67	75	Clostridia	Firmicutes	TRM3
Benthic	4_5 (HM636758)	1	1.66667	Moorella thermoacetica ATCC 39073 (ABC20019.1)	52	62	Clostridia	Firmicutes	TRM3
Benthic	4_7 (HM636759)	1	1.66667	Symbiobacterium thermophilum IAM 14863 (YP_077035.1)	65	79	Clostridia	Firmicutes	TRM3
Benthic	4_8 (HM636760)	1	1.66667	Symbiobacterium thermophilum IAM 14863 (YP_077035.1)	59	73	Clostridia	Firmicutes	TRM3
Benthic	4_23 (HM636761)	1	1.66667	Bacteroides thetaiotaomicron VPI-5482 (NP_809037.1)	70	83	Bacteroidia	Bacteroidetes	TRM3
Benthic	4_56 (HM636762)	1	1.66667	Symbiobacterium thermophilum IAM 14863 (YP_077035.1)	64	77	Clostridia	Firmicutes	TRM3
Benthic	4_58 (HM636763)	1	1.66667	Bacteroides thetaiotaomicron VPI-5482 (NP_809037.1)	68	84	Bacteroidia	Bacteroidetes	TRM3
Benthic	4_65 (HM636764)	1	1.66667	Opitutus terrae PB90-1 (ACB74828.1)	62	82	Opitutae	Verrucomicrobia	TRM3
Benthic	4_70 (HM636765)	1	1.66667	Bacteroides thetaiotaomicron VPI-5482 (NP_809037.1)	68	83	Bacteroidia	Bacteroidetes	TRM3
Benthic	4_71 (HM636766)	2	3.33333	Moorella thermoacetica ATCC 39073 (ABC20019.1)	63	76	Clostridia	Firmicutes	TRM3
Benthic	4_72 (HM636767)	1	1.66667	Desulfotomaculum acetoxidans DSM 771 (YP_003189750.1)	60	70	Clostridia	Firmicutes	TRM3
Benthic	4_88 (HM636768)	1	1.66667	Syntrophobacter fumaroxidans MPOB (YP_844976.1)	63	76	δ-Proteobacteria	Proteobacteria	TRM3
Benthic	4_97 (HM636769)	1	1.66667	Thalassiosira pseudonana CCMP1335 (XP_002295160.1)	62	79	Coscinodiscophyceae	Bacillariophyta	TRM3
Benthic	4_99 (HM636770)	1	1.66667	Bacteroides intestinalis DSM 17393 (ZP_03015926.1)	71	86	Bacteroidia	Bacteroidetes	???
Benthic	4_100 (HM636771)	2	3.33333	Opitutus terrae PB90-1 (ACB74828.1)	68	81	Opitutae	Verrucomicrobia	TRM3
Benthic	4_102 (HM636772)	1	1.66667	Bacteroides sp. 2_2_4 (ZP_04552912.1)	75	87	Bacteroidia	Bacteroidetes	TRM3
Benthic	4_111 (HM636773)	1	1.66667	Bacteroides sp. 2_2_4 (ZP_04552912.1)	74	86	Bacteroidia	Bacteroidetes	TRM3
Benthic	4_112 (HM636774)	1	1.66667	Clostridium thermocellum ATCC 27405 (YP_001036773.1)	64	79	Clostridia	Firmicutes	???
Benthic	4_136 (HM636775)	1	1.66667	Bacteroides thetaiotaomicron VPI-5482 (NP_809037.1)	74	86	Bacteroidia	Bacteroidetes	TRM3
Benthic	4_151 (HM636776)	2	3.33333	Opitutus terrae PB90-1 (ACB74828.1)	56	75	Opitutae	Verrucomicrobia	TRM3
Benthic	4_153 (HM636777)	2	3.33333	Thermanaerovibrio acidaminovorans DSM 6589 (YP_00331)6672.1	70	85	Synetgista	Synergistetes	TRM3
Benthic	4_154 (HM636778)	11	18.3333	Moorella thermoacetica ATCC 39073 (ABC20019.1)	63	77	Clostridia	Firmicutes	TRM3
Benthic	4_159 (HM636779)	1	1.66667	Thermoanaerobacterium saccharolyticum (ACA51661.1)	58	77	Clostridia	Firmicutes	???
Benthic	4_160 (HM636780)	1	1.66667	Blautia hydrogenotrophica DSM 10507 (ZP_03780903.1)	56	73	Clostridia	Firmicutes	TRM3
Benthic	4_161 (HM636781)	1	1.66667	Moorella thermoacetica ATCC 39073 (ABC20019.1)	66	82	Clostridia	Firmicutes	TRM3
Benthic	4_164 (HM636782)	1	1.66667	Symbiobacterium thermophilum IAM 14863 (YP_077035.1)	61	75	Clostridia	Firmicutes	TRM3
Benthic	4_165 (HM636783)	1	1.66667	Opitutus terrae PB90-1 (ACB74828.1)	59	71	Opitutae	Verrucomicrobia	TRM3
Benthic	4_166 (HM636784)	1	1.66667	Thermanaerovibrio acidaminovorans DSM 6589 (YP_00331)6672.1	68	82	Synetgista	Synergistetes	TRM3
Benthic	4_169 (HM636785)	1	1.66667	Pelotomaculum thermopropionicum SI (YP_001212560.1)	72	87	Clostridia	Firmicutes	TRM3
Benthic	4_171 (HM636786)	1	1.66667	Bacteroides thetaiotaomicron VPI-5482 (NP_809037.1)	69	84	Bacteroidia	Bacteroidetes	TRM3
Benthic	4_172 (HM636787)	1	1.66667	Syntrophobacter fumaroxidans MPOB (YP_844976.1)	55	71	δ-Proteobacteria	Proteobacteria	TRM3
Benthic	4_173 (HM636788)	1	1.66667	Thermanaerovibrio acidaminovorans DSM 6589 (YP_00331)6672.1	69	83	Synetgista	Synergistetes	TRM3
Benthic	4_174 (HM636789)	2	3.33333	Symbiobacterium thermophilum IAM 14863 (YP_077035.1)	61	76	Clostridia	Firmicutes	TRM3
Benthic	4_175 (HM636790)	1	1.66667	Symbiobacterium thermophilum IAM 14863 (YP_077035.1)	64	77	Clostridia	Firmicutes	TRM3
Benthic	4_176 (HM636791)	2	3.33333	Opitutus terrae PB90-1 (ACB74828.1)	58	75	Opitutae	Verrucomicrobia	TRM3
Benthic	4_178 (HM636792)	1	1.66667	Thermanaerovibrio acidaminovorans DSM 6589 (YP_00331)6672.1	73	90	Synetgista	Synergistetes	TRM3
Benthic	4_179 (HM636793)	1	1.66667	Moorella thermoacetica ATCC 39073 (ABC20019.1)	67	80	Clostridia	Firmicutes	TRM3
Benthic	4_181 (HM636794)	1	1.66667	Bacteroides thetaiotaomicron VPI-5482 (NP_809037.1)	68	84	Bacteroidia	Bacteroidetes	TRM3
Benthic	4_183 (HM636795)	1	1.66667	Moorella thermoacetica ATCC 39073 (ABC20019.1)	68	83	Clostridia	Firmicutes	TRM3
Benthic	4_184 (HM636796)	1	1.66667	Tolumonas auensis DSM 9187 (YP_002892704.1)	74	87	γ-Proteobacteria	Proteobacteria	TRM3
Benthic	4_188 (HM636797)	1	1.66667	Candidatus Desulforudis audaxviator MP104C (YP_001716352.1)	60	78	Clostridia	Firmicutes	???
Benthic	4_189 (HM636798)	1	1.66667	Symbiobacterium thermophilum IAM 14863 (YP_077035.1)	63	76	Clostridia	Firmicutes	TRM3
a: Representative Sequence for each OTU in each community;
b: Percent of total sequences in each community represented by this OTU;
c: Based on BLASTp analysis;
d: Putative structural class. Classes correspond to those presented in Figure 4. A sequence that could not be defined is indicated by question marks.

## Sheet: Table S2
Table S2. Predicted isoelectric point, aliphatic index, and GRAVY index for inferred HydA sequences recovered from YNP, GN, and GSL.
Environment a	Representative Clone b	Frequency in Library	IEP c	AI c	GI c
HL2	E2_11 (GU362773)	10	5.64	71.48	-0.258
HL1	E3_10 (GU362774)	11	5.64	71.48	-0.258
IG1	E4_1 (GU362775)	1	5.26	69	-0.209
IG1	E4_10 (GU362776)	1	5.26	69	-0.209
IG1	E4_11 (GU362777)	4	4.85	78.77	-0.31
IG1	E4_12 (GU362778)	2	5.77	76.17	-0.073
IG1	E4_12a (GU362779)	1	5.5	77.52	-0.024
IG1	E4_22 (GU362780)	1	5.32	80.14	-0.5
IG1	E4_24 (GU362781)	1	9.3	83.06	-0.129
IG1	E4_25 (GU362782)	1	6.81	65.59	-0.237
IG1	E4_26 (GU362783)	1	4.85	79.45	-0.295
IG1	E4_28 (GU362784)	1	4.75	85.55	-0.109
IG1	E4_29 (GU362785)	1	4.63	79.57	-0.11
IG1	E4_3 (GU362786)	1	5.5	77.52	-0.035
IG1	E4_31 (GU362787)	1	5.49	73.93	-0.08
IG1	E4_32 (GU362788)	1	8.49	79.59	-0.097
IG1	E4_4 (GU362789)	1	5.5	76.17	-0.052
IG1	E4_5 (GU362790)	1	5.32	74.35	-0.306
IG1	E4_6 (GU362791)	1	5.45	73.86	-0.281
IG1	E4_6a (GU362792)	1	4.86	76.81	-0.154
IG1	E4_7 (GU362793)	1	4.73	85.55	-0.129
IG1	E4_8 (GU362794)	1	6.81	66.25	-0.235
IG1	E4_9 (GU362795)	4	5.29	77.52	-0.049
NL1	E5_10 (GU362796)	15	5.28	91.34	-0.086
NL1	E5_15 (GU362797)	1	8.83	78.98	-0.418
NL1	E5_17 (GU362798)	1	7.85	74.25	-0.245
NL1	E5_19 (GU362799)	1	8.74	78.37	-0.158
NL1	E5_22 (GU362800)	1	5.14	85.48	-0.121
NL1	E5_23 (GU362801)	1	5.09	90	-0.105
NL1	E5_4 (GU362802)	1	5.48	69.37	-0.247
NL1	E5_7 (GU362803)	2	5.28	92.04	-0.084
NL1	E5_9 (GU362804)	1	5.5	92.73	-0.036
NL2	E6_10 (GU362805)	2	5.54	76	-0.094
NL2	E6_12 (GU362806)	2	4.85	78.91	-0.298
NL2	E6_13 (GU362807)	1	7.83	84.18	-0.153
NL2	E6_17 (GU362808)	3	5.81	77.36	-0.191
NL2	E6_18 (GU362809)	1	4.73	85.55	-0.129
NL2	E6_19 (GU362810)	4	4.85	79.45	-0.295
NL2	E6_2 (GU362811)	1	5.81	76.81	-0.204
NL2	E6_21 (GU362812)	6	8.8	77.84	-0.168
NL2	E6_3 (GU362813)	1	5.86	68.09	-0.266
NL2	E6_5 (GU362814)	1	5.94	79.43	-0.083
NL2	E6_7 (GU362815)	1	5.09	90	-0.105
NL2	E6_7a (GU362816)	1	6.1	77.36	-0.176
NL2	E6_8 (GU362817)	1	5.54	76	-0.097
IG4	E7_1 (GU362818)	4	6.81	66.25	-0.235
IG4	E7_10 (GU362819)	3	4.81	78.98	-0.09
IG4	E7_11 (GU362820)	2	6.81	65.59	-0.237
IG4	E7_13 (GU362821)	3	4.58	86.78	-0.082
IG4	E7_2 (GU362822)	2	6.81	66.25	-0.234
IG4	E7_21 (GU362823)	1	5.53	81.45	-0.011
IG4	E7_22 (GU362824)	1	4.95	72.89	-0.289
IG4	E7_25 (GU362825)	1	6.81	66.91	-0.233
IG4	E7_26 (GU362826)	1	7.87	65.82	-0.236
IG4	E7_27 (GU362827)	1	8.74	79.05	-0.161
IG4	E7_28 (GU362828)	1	4.93	78.77	-0.288
IG4	E7_29 (GU362829)	1	4.96	77.43	-0.142
IG4	E7_6 (GU362830)	1	4.7	89.52	-0.16
IG4	E7_9 (GU362831)	1	8.74	79.05	-0.161
IG3	E8_10 (GU362832)	1	5.39	84.29	-0.085
IG3	E8_12 (GU362833)	1	4.7	75.29	-0.036
IG3	E8_13 (GU362834)	1	8.46	87.09	-0.091
IG3	E8_14 (GU362835)	3	5.14	85.48	-0.121
IG3	E8_16 (GU362836)	1	4.97	83.38	-0.16
IG3	E8_17 (GU362837)	6	4.7	78.07	-0.029
IG3	E8_19 (GU362838)	1	8.74	78.37	-0.158
IG3	E8_22 (GU362839)	1	4.97	82.81	-0.137
IG3	E8_24 (GU362840)	1	4.83	78.07	-0.031
IG3	E8_28 (GU362841)	1	6.57	87.69	-0.04
IG3	E8_29 (GU362842)	1	4.7	78.79	-0.026
IG3	E8_3 (GU362843)	1	5.17	82.24	-0.194
IG3	E8_4 (GU362844)	1	5.4	82.81	-0.14
IG3	E8_6 (GU362845)	1	4.7	76.71	-0.046
NG	E9_1 (GU362846)	1	5.69	80.14	0.006
NG	E9_10 (GU362847)	1	5.01	65.28	-0.226
NG	E9_11 (GU362848)	2	4.58	86.78	-0.082
NG	E9_12 (GU362849)	1	6.79	85.57	-0.193
NG	E9_13 (GU362850)	1	5.04	62.54	-0.283
NG	E9_14 (GU362851)	1	5.27	76	-0.079
NG	E9_15 (GU362852)	1	5.32	78.87	-0.143
NG	E9_18 (GU362853)	2	5.17	62.54	-0.261
NG	E9_19 (GU362854)	2	5.64	70.98	-0.281
NG	E9_2 (GU362855)	1	5.35	75.29	-0.239
NG	E9_20 (GU362856)	2	6.79	82.79	-0.2
NG	E9_23 (GU362857)	1	5.21	71.22	-0.384
NG	E9_24 (GU362858)	1	4.72	74.18	-0.086
NG	E9_3 (GU362859)	2	5.49	76.71	-0.041
NG	E9_9 (GU362860)	1	5.18	75.29	-0.255
IG2	E10_1 (GU362861)	4	4.58	86.78	-0.082
IG2	E10_23 (GU362862)	1	4.88	79.66	-0.059
IG2	E10_25 (GU362863)	1	4.88	79.66	-0.059
IG2	E10_27 (GU362864)	1	5.92	79.72	-0.056
IG2	E10_3 (GU362865)	1	6.79	82.79	-0.2
IG2	E10_4 (GU362866)	1	4.58	89.45	-0.071
IG2	E10_6 (GU362867)	1	5.94	84.83	-0.094
GN	hydA5 (FJ623912)	7	4.69	74.39	-0.232
GN	hydA4 (FJ623909)	5	5.17	62.54	-0.261
GN	hydA21 (FJ623898)	3	5.31	70.22	-0.257
GN	hydA38 (FJ623907)	3	5.16	80.89	-0.236
GN	hydA37 (FJ623906)	2	4.5	73.07	-0.217
GN	hydA72 (FJ623932)	2	4.76	80.14	-0.238
GN	hydA11 (FJ623894)	2	4.39	81.44	-0.26
GN	hydA84 (FJ623943)	2	6.79	80.27	-0.281
GN	hydA39 (FJ623908)	2	4.64	67.8	-0.304
GN	hydA75 (FJ623934)	2	4.92	83.87	-0.173
GN	hydA8 (FJ623939)	2	8.75	76.94	-0.331
GN	hydA7 (FJ623929)	2	4.57	70.14	-0.227
GN	hydA2 (FJ623897)	2	5.02	80.21	-0.158
GN	hydA95 (FJ623955)	1	5.04	79.45	-0.31
GN	hydA50 (FJ623913)	1	4.73	75.48	-0.319
GN	hydA97 (FJ623956)	1	4.73	76.85	-0.155
GN	hydA73 (FJ623933)	1	5.2	78.22	-0.142
GN	hydA34 (FJ623903)	1	5.55	89.29	-0.218
GN	hydA41 (FJ623910)	1	4.88	67.8	-0.233
GN	hydA23 (FJ623900)	1	4.59	75.48	-0.217
GN	hydA35 (FJ623904)	1	5.36	78.3	0.028
GN	hydA79 (FJ623938)	1	5.2	65.28	-0.252
GN	hydA53 (FJ623916)	1	8.75	76.94	-0.331
GN	hydA82 (FJ623942)	1	4.77	71.51	-0.258
GN	hydA62 (FJ623924)	1	4.7	75.48	-0.173
GN	hydA3 (FJ623902)	1	4.89	75.14	-0.243
GN	hydA94 (FJ623954)	1	4.84	68.37	-0.224
GN	hydA22 (FJ623899)	1	4.66	74.79	-0.125
GN	hydA16 (FJ623895)	1	5.04	78.15	-0.169
GN	hydA91 (FJ623951)	1	4.83	64.2	-0.29
GN	hydA61 (FJ623923)	1	5.11	66.69	-0.242
GN	hydA52 (FJ623915)	1	5.93	67.39	-0.439
GN	hydA49 (FJ623911)	1	4.74	65.92	-0.151
GN	hydA81 (FJ623941)	1	4.9	68.03	-0.223
GN	hydA85 (FJ623944)	1	4.98	77.59	-0.038
GN	hydA67 (FJ623927)	1	4.8	82.41	-0.025
GN	hydA99 (FJ623958)	1	4.95	76.16	-0.286
GN	hydA60 (FJ623922)	1	4.76	78.15	-0.118
GN	hydA80 (FJ623940)	1	5.62	78.15	-0.237
GN	hydA57 (FJ623919)	1	8.44	79.5	-0.181
GN	hydA17 (FJ623896)	1	7.57	82.29	-0.286
GN	hydA71 (FJ623931)	1	8.47	69	-0.341
GSL1	1_1 (HM636647)	1	4.63	64.72	-0.253
GSL1	1_14 (HM636652)	4	5.69	78.63	-0.024
GSL1	1_15 (HM636653)	9	5.18	71.14	-0.321
GSL1	1_16 (HM636654)	1	5.91	74.64	-0.277
GSL1	1_17 (HM636655)	2	6.92	73.61	-0.339
GSL1	1_20 (HM636656)	6	6.16	72.24	-0.337
GSL1	1_22 (HM636657)	1	4.86	59.15	-0.289
GSL1	1_26 (HM636658)	1	5.18	71.14	-0.321
GSL1	1_27 (HM636659)	3	4.9	82.19	-0.245
GSL1	1_28 (HM636660)	1	4.84	78.08	-0.274
GSL1	1_3 (HM636648)	1	5.18	71.14	-0.321
GSL1	1_32 (HM636661)	1	6.16	71.76	-0.34
GSL1	1_33 (HM636662)	1	6.16	72.24	-0.341
GSL1	1_34 (HM636663)	1	4.92	68.9	-0.423
GSL1	1_35 (HM636664)	1	4.4	78.24	-0.388
GSL1	1_37 (HM636665)	2	5.87	71.14	-0.324
GSL1	1_39 (HM636666)	1	4.71	79.52	-0.249
GSL1	1_40 (HM636667)	1	6.15	74.97	-0.399
GSL1	1_41 (HM636668)	1	4.95	62.61	-0.363
GSL1	1_43 (HM636669)	1	4.99	66.62	-0.262
GSL1	1_44 (HM636670)	1	4.85	64.65	-0.324
GSL1	1_45 (HM636671)	1	4.76	66.06	-0.27
GSL1	1_46 (HM636672)	3	5.03	70.17	-0.408
GSL1	1_47 (HM636673)	1	7.01	70.95	-0.386
GSL1	1_6 (HM636649)	1	5.19	71.58	-0.403
GSL1	1_60 (HM636674)	1	4.88	73.93	-0.289
GSL1	1_65 (HM636675)	1	8.79	72.38	-0.424
GSL1	1_66 (HM636676)	1	4.9	79.52	-0.252
GSL1	1_67 (HM636677)	1	4.92	70.89	-0.407
GSL1	1_68 (HM636678)	1	5.04	68.4	-0.283
GSL1	1_69 (HM636679)	1	7.89	76.94	-0.299
GSL1	1_7 (HM636650)	1	5.73	72.24	-0.359
GSL1	1_70 (HM636680)	1	6.09	73.21	-0.369
GSL1	1_71 (HM636681)	1	5.18	71.14	-0.327
GSL1	1_74 (HM636682)	1	5.04	70.14	-0.384
GSL1	1_9 (HM636651)	1	5.23	72.62	-0.384
GSL2	2_12 (HM636686)	1	4.56	68.9	-0.285
GSL2	2_129 (HM636704)	2	4.76	73.06	-0.269
GSL2	2_13 (HM636687)	1	4.54	78.9	-0.321
GSL2	2_138 (HM636705)	1	5.14	85.71	-0.08
GSL2	2_14 (HM636688)	6	4.92	72.74	-0.361
GSL2	2_140 (HM636706)	1	5.01	71.79	-0.232
GSL2	2_144 (HM636707)	1	5.02	75.65	-0.269
GSL2	2_15 (HM636689)	1	4.84	73.42	-0.359
GSL2	2_151 (HM636708)	1	5.16	74.57	0.014
GSL2	2_159 (HM636709)	1	4.85	76.71	-0.055
GSL2	2_16 (HM636690)	7	4.78	75.65	-0.264
GSL2	2_166 (HM636710)	1	7.95	75.29	-0.404
GSL2	2_168 (HM636711)	1	5.35	78.15	-0.357
GSL2	2_169 (HM636712)	1	5.69	78.79	-0.011
GSL2	2_170 (HM636713)	1	5.32	80.82	-0.214
GSL2	2_171 (HM636714)	1	4.78	75.65	-0.272
GSL2	2_174 (HM636715)	2	5.51	67.69	-0.327
GSL2	2_175 (HM636716)	2	5.15	68.1	-0.269
GSL2	2_177 (HM636717)	1	4.78	78.3	-0.257
GSL2	2_178 (HM636718)	1	5.45	68.29	-0.104
GSL2	2_18 (HM636691)	1	4.46	79.63	-0.263
GSL2	2_180 (HM636719)	1	4.92	72.74	-0.384
GSL2	2_181 (HM636720)	1	5.15	77.43	-0.009
GSL2	2_187 (HM636721)	1	5.71	79.5	-0.162
GSL2	2_189 (HM636722)	2	4.55	77.4	-0.312
GSL2	2_26 (HM636692)	1	4.66	81.31	-0.342
GSL2	2_28 (HM636693)	1	4.77	67.43	-0.268
GSL2	2_31 (HM636694)	1	4.68	71.63	-0.31
GSL2	2_35 (HM636695)	1	5.16	75.29	0.034
GSL2	2_38 (HM636696)	1	4.8	75.41	-0.375
GSL2	2_4 (HM636683)	1	4.87	63.31	-0.328
GSL2	2_43 (HM636697)	1	4.79	71.63	-0.357
GSL2	2_47 (HM636698)	1	5.69	74.57	0.022
GSL2	2_48 (HM636699)	1	8.41	75.65	-0.345
GSL2	2_52 (HM636700)	1	5.53	70.85	-0.237
GSL2	2_55 (HM636701)	1	5.48	66.94	-0.511
GSL2	2_59 (HM636702)	1	5.97	76.78	-0.54
GSL2	2_63 (HM636703)	1	5.03	73.42	-0.363
GSL2	2_7 (HM636684)	1	4.78	75.65	-0.246
GSL2	2_8 (HM636685)	1	4.79	83.49	-0.185
GSL3	3_1 (HM636723)	1	5.46	72.62	-0.385
GSL3	3_11 (HM636726)	1	5.14	82.21	0.052
GSL3	3_14 (HM636727)	1	5.17	74.64	-0.159
GSL3	3_2 (HM636724)	1	4.45	66.92	-0.321
GSL3	3_25 (HM636728)	2	4.84	73.42	-0.359
GSL3	3_26 (HM636729)	7	4.85	76.71	-0.023
GSL3	3_27 (HM636730)	1	8.24	68.77	-0.447
GSL3	3_29 (HM636731)	2	5.15	68.1	-0.269
GSL3	3_3 (HM636725)	1	4.34	76.03	-0.324
GSL3	3_30 (HM636732)	5	4.92	72.74	-0.361
GSL3	3_31 (HM636733)	1	4.85	76	-0.025
GSL3	3_32 (HM636734)	3	5.17	78.15	-0.357
GSL3	3_34 (HM636735)	1	4.76	73.06	-0.269
GSL3	3_36 (HM636736)	1	5.04	70.14	-0.384
GSL3	3_37 (HM636737)	1	5.41	82.31	-0.265
GSL3	3_38 (HM636738)	2	5.44	71.99	-0.333
GSL3	3_39 (HM636739)	1	6.78	64.65	-0.282
GSL3	3_40 (HM636740)	3	4.78	75.65	-0.264
GSL3	3_41 (HM636741)	1	5.15	67.39	-0.287
GSL3	3_43 (HM636742)	1	5.29	69.79	-0.221
GSL3	3_45 (HM636743)	1	5.01	71.99	-0.264
GSL3	3_46 (HM636744)	2	4.84	73.42	-0.359
GSL3	3_63 (HM636745)	1	4.84	73.42	-0.359
GSL3	3_65 (HM636746)	1	7.95	75.29	-0.404
GSL3	3_68 (HM636747)	1	7.8	68.84	-0.175
GSL3	3_73 (HM636748)	2	6.48	73.4	-0.31
GSL3	3_74 (HM636749)	1	8.51	81.57	-0.276
GSL3	3_75 (HM636750)	1	4.93	73.42	-0.334
GSL3	3_76 (HM636751)	1	4.78	72.99	-0.301
GSL3	3_77 (HM636752)	1	5.13	68.1	-0.3
GSL3	3_79 (HM636753)	1	5.03	64.65	-0.375
GSL3	3_82 (HM636754)	1	4.56	70.89	-0.253
GSL3	3_84 (HM636755)	2	4.75	69.37	-0.271
GSL4	4_100 (HM636771)	2	5.15	68.1	-0.269
GSL4	4_102 (HM636772)	1	5.17	76.16	-0.26
GSL4	4_111 (HM636773)	1	5.38	76.85	-0.377
GSL4	4_112 (HM636774)	1	5.44	71.99	-0.333
GSL4	4_136 (HM636775)	1	5.17	77.47	-0.359
GSL4	4_151 (HM636776)	2	4.86	59.15	-0.289
GSL4	4_153 (HM636777)	2	5.03	67.47	-0.444
GSL4	4_154 (HM636778)	11	6.16	72.24	-0.337
GSL4	4_159 (HM636779)	1	7.05	74.64	-0.291
GSL4	4_160 (HM636780)	1	4.83	73.21	-0.051
GSL4	4_161 (HM636781)	1	6.14	72.31	-0.28
GSL4	4_164 (HM636782)	1	4.85	67.57	-0.363
GSL4	4_165 (HM636783)	1	4.72	61.9	-0.38
GSL4	4_166 (HM636784)	1	5.05	69.19	-0.474
GSL4	4_169 (HM636785)	1	4.72	79.36	-0.286
GSL4	4_171 (HM636786)	1	4.85	67.4	-0.51
GSL4	4_172 (HM636787)	1	5.16	73.86	-0.301
GSL4	4_173 (HM636788)	1	5.04	70.14	-0.384
GSL4	4_174 (HM636789)	2	5.18	71.14	-0.321
GSL4	4_175 (HM636790)	1	6.79	74.97	-0.32
GSL4	4_176 (HM636791)	2	4.69	60.56	-0.294
GSL4	4_178 (HM636792)	1	5.2	74.11	-0.264
GSL4	4_179 (HM636793)	1	5.07	71.4	-0.394
GSL4	4_181 (HM636794)	1	4.85	67.4	-0.514
GSL4	4_183 (HM636795)	1	7.84	76.94	-0.29
GSL4	4_184 (HM636796)	1	5.71	69.34	-0.332
GSL4	4_188 (HM636797)	1	6.09	73.21	-0.398
GSL4	4_189 (HM636798)	1	6.92	72.24	-0.316
GSL4	4_23 (HM636761)	1	5.34	67.5	-0.513
GSL4	4_4 (HM636757)	1	5.04	67.28	-0.306
GSL4	4_5 (HM636758)	1	9.66	71.38	-0.552
GSL4	4_56 (HM636762)	1	5.04	74.25	-0.36
GSL4	4_58 (HM636763)	1	4.7	70.75	-0.461
GSL4	4_65 (HM636764)	1	5.27	58.67	-0.339
GSL4	4_7 (HM636759)	1	6.92	74.01	-0.499
GSL4	4_70 (HM636765)	1	4.99	70.55	-0.521
GSL4	4_71 (HM636766)	2	6.16	69.59	-0.35
GSL4	4_72 (HM636767)	1	5.35	82.93	-0.096
GSL4	4_8 (HM636760)	1	5.88	69.93	-0.384
GSL4	4_88 (HM636768)	1	4.63	72.19	-0.303
GSL4	4_97 (HM636769)	1	4.85	73.42	-0.421
GSL4	4_99 (HM636770)	1	7.92	77.68	-0.323
a: Environment where each sequence was obtained;
b: Representative sequence from each phylotype;
c: IEP, isoelectric point; AI, aliphatic index; GRAVY, grand average of hydrophobicity index;
Abbreviations: HL, Heart Lake, Yellowstone National Park (YNP); IG, Imperial Geyser, YNP; NL, Nymph Lake, YNP; NG, Norris Geyser, YNP; GN, Guerrero Negro; GSL, Great Salt Lake.

## Sheet: Table S3
Table S3. Reference sequences and their inferred modular structure as compiled from Calusinska et al., 2010 [19]. These sequences were used to develop the phylogenetic framework for predicting the structral class that hydA fragments obtained from GSL likely encode.
Sequence ID	Taxon	Accession Number	Structural Class a
992_M3	Clostridium cellulovorans 743B	AAA85785	M3
994_M3	Clostridium pasteurianum	AAA23248	M3
995_M3	Clostridium tyrobutyricum	ACI42788	M3
996_TEM2	Clostridium kluyveri DSM 555	YP_001394240	TE(M2)
997_TRM2	Desulfovibrio salexigens DSM 2638	ZP_03467896	TR(M2)
998_SR	Desulfovibrio fructosivorans JJ	CAA72423	Sulfur reducers, periplasmic, dimeric
999_SR	Desulfovibrio vulgaris DP4	YP_966831	Sulfur reducers, periplasmic, dimeric
1000_SR	Desulfovibrio desulfuricans ATCC 27774	ACL49405	Sulfur reducers, periplasmic, dimeric
1001_TRM3	Candidatus Cloacimonas acidaminovorans str. Evry	YP_001741248	TR(M3)
1002_M2d	Desulfitobacterium hafniense DCB-2	YP_002461058	M2d
1003_M2d	Clostridium hylemonae DSM15053	ZP_03481026	M2d
1004_M2d	Clostridiales bacterium 1_7_47_FAA	ZP_03651544	M2d
1005_M2c	Fusobacterium varium ATCC 27725	ZP_04858845	M2c
1006_TRM3	Desulfovibrio fructosivorans	WP_005990603	TR(M3)
1007_TRM3	Clostridium papyrosolvens DSM 2782	ZP_05495280	TR(M3)
1011_Hydro	Trichomonas vaginalis G3	EAY17406	Hydrogenosomal Protists
1012_Hydro	Histomonas meleagridis	ACI16483	Hydrogenosomal Protists
1013_DM3	Collinsella aerofaciens ATCC 25986	EBA39482	D(M3)
1014_DM3	Clostridium scindens ATCC 35704	ZP_02431953	D(M3)
1015_TRM3	Blautia hansenii DSM 20583	ZP_03548879	TR(M3)
1016_TRM3	Clostridium hylemonae DSM 15053	WP_006444067	TR(M3)
1017_TRM3	Clostridium papyrosolvens DSM 2782	ZP_05497653	TR(M3)
1018_TRM3	Clostridium saccharoperbutylacetonicum N1-4(HMT)	AAV86076	TR(M3)
1019_DM2g	Clostridium thermocellum ATCC 27405	YP_001039392	D(M2g)
1020_ThermTri	Thermotoga maritima MSB8	NP_229226	Thermotogae, trimeric
1021_TRM3	Clostridium papyrosolvens DSM 2782	WP_004616751	TR(M3)
1022_TRM3	Clostridiales bacterium 1_7_47_FAA	ZP_03651102	TR(M3)
1023_TRM3	Clostridium papyrosolvens DSM 2782	ZP_05494541	TR(M3)
1024_TRM3	Eubacterium acidaminophilum DSM 3953	CAC39231	TR(M3)
1025_TRM3	Clostridium methylpentosum DSM 5476	ZP_03705348	TR(M3)
1026_TRM1	Clostridium leptum DSM 753	ZP_02082403	TR(M1)
1027_TRM3	Clostridium hylemonae DSM 15053	ZP_03480570	TR(M3)
1028_TRM3	Clostridiales bacterium 1_7_47_FAA	ZP_03651101	TR(M3)
1029_M3aP	Clostridiales bacterium 1_7_47_FAA	ZP_03652433	M3a'
1030_M3aP	Bryantella formatexigens DSM 14469	ZP_03686328	M3a'
1031_M2a	Clostridium cellulovorans 743B	ZP_04805685	M2a
1032_M3aP	Clostridiales bacterium 1_7_47_FAA	ZP_03651292	M3a'
1033_M3aP	Clostridium carboxidivorans P7	ZP_05392646	M3a'
1034_DM2f	Dictyoglomus thermophilum H-6-12	YP_002250290	D(M2f)
1035_M2f	Clostridium bartlettii DSM 16795	ZP_02212773	M2f
1036_M2f	Clostridium bartlettii DSM 16795	ZP_02212776	M2f
1037_DM2f	Clostridium cellulolyticum H10	ZP_01573821	D(M2f)
1038_DM2f	Clostridium papyrosolvens DSM 2782	ZP_05497650	D(M2f)
1039_DM2f	Thermosinus carboxydivorans Nor1	ZP_01667379	D(M2f)
1040_DM2f	Clostridium scindens ATCC 35704	ZP_02433357	D(M2f)
1041_DM2f	Clostridiales bacterium 1_7_47_FAA	ZP_03651294	D(M2f)
1042_M2e	Clostridium ramosum DSM 1402	ZP_02427924	M2e
1043_M2e	Clostridium spiroforme DSM 1552	ZP_02868193	M2e
1044_M2e	Dictyoglomus turgidum DSM 6724	YP_002352807	M2e
1045_M2e	Parabacteroides distasonis ATCC 8503	YP_001302480	M2e
1046_M2e	Candidatus Cloacimonas acidaminovorans str. Evry	YP_001741257	M2e
1047_M2e	Clostridium thermocellum ATCC 27405	YP_001036766	M2e
1048_M2e	Caldicellulosiruptor saccharolyticus DSM 8903	YP_001180633	M2e
1049_M2e	Clostridium leptum DSM 753	ZP_02082395	M2e
1050_M2e	Anaerotruncus colihominis DSM 17241	ZP_02442941	M2e
1051_M2e	Clostridium scindens ATCC 35704	ZP_02433347	M2e
1052_M2e	Clostridium hathewayi DSM 13479	ZP_06115111	M2e
1053_M2e	Clostridium asparagiforme DSM 15981	ZP_03760831	M2e
1054_M2e	Clostridium bolteae ATCC BAA-613	ZP_02083508	M2e
1055_M2e	Clostridiales bacterium 1_7_47_FAA	ZP_03651094	M2e
1056_TRM3	Clostridium papyrosolvens	WP_004618519	TR(M3)
1_TRM3	Clostridium cellulolyticum H10	YP_002506554	TR(M3)
2_TRM3	Clostridium thermocellum ATCC 27405	YP_001036773	TR(M3)
3_TRM3	Caldicellulosiruptor saccharolyticus DSM 8903	YP_001180640	TR(M3)
4_TRM3	Anaerocellum thermophilum DSM 6725	ZP_03325292	TR(M3)
5_TRM3	Alkaliphilus oremlandii OhILAs	YP_001512473	TR(M3)
6_TRM3	Clostridium asparagiforme DSM 15981	ZP_03760851	TR(M3)
7_TRM3	Clostridium bolteae ATCC BAA-613	ZP_02083481	TR(M3)
8_M3	Clostridium cellulolyticum H10	YP_002506776	M3
9_TRM3	Clostridium spiroforme DSM 1552	ZP_02868187	TR(M3)
10_TRM3	Clostridium ramosum DSM 1402	ZP_02427918	TR(M3)
11_TRM3	Alkaliphilus metalliredigens QYMF	YP_001321847	TR(M3)
12_TRM3	Pseudoflavonifractor capillosus ATCC 29799	ZP_02037133	TR(M3)
13_TRM3	Anaerotruncus colihominis DSM 17241	ZP_02444642	TR(M3)
14_TRM3	Clostridium scindens ATCC 35704	ZP_02433354	TR(M3)
15_TRM3	Clostridium nexile DSM 1787	ZP_03290965	TR(M3)
16_TRM3	Ruminococcus torques ATCC 17756	ZP_01966799	TR(M3)
17_TRM3	Clostridium phytofermentans ISDg	YP_001560891	TR(M3)
18_TRM3	Clostridium hathewayi DSM 13479	ZP_06111963	TR(M3)
19_TRM3	Clostridium bolteae ATCC BAA-613	ZP_02083500	TR(M3)
20_M2b	Clostridium beijerinckii NCIMB 8052	YP_001311066	M2b
21_M3	Clostridium botulinum C str. Eklund	ZP_02621445	M3
22_M3	Clostridium novyi NT	YP_878332	M3
23_M3	Clostridium perfringens ATCC 13124	YP_697035	M3
24_M3	Clostridium butyricum 5521	ZP_02951233	M3
25_M3	Clostridium botulinum B str. Eklund 17B	YP_001884306	M3
26_M3	Clostridium acetobutylicum ATCC 824	NP_346675	M3
28_TRM2	Clostridium carboxidivorans P7	ZP_05394385	TR(M2)
29_TRM2	Clostridium beijerinckii NCIMB 8052	YP_001310869	TR(M2)
30_TRM2	Symbiobacterium thermophilum IAM 14863	YP_077118	TR(M2)
31_TRM2	Clostridium bartlettii DSM 16795	ZP_02210702	TR(M2)
32_TRM2	Clostridium difficile 630	YP_001089830	TR(M2)
33_TRM2	Desulfotalea psychrophila LSv54	YP_064215	TR(M2)
34_TRM2	Desulfovibrio alaskensis G20	YP_386971	TR(M2)
35_M2d	Clostridium bolteae ATCC BAA-613	ZP_02089645	M2d
36_M2d	Clostridium scindens ATCC 35704	ZP_02432096	M2d
37_M2d	Clostridium hathewayi DSM 13479	ZP_06112087	M2d
38_M2d	Clostridium perfringens ATCC 13124	YP_695522	M2d
39_M2d	Anaerostipes caccae DSM 14662	ZP_02417946	M2d
40_M2d	Clostridium asparagiforme DSM 15981	ZP_03761376	M2d
41_M2c	Clostridium beijerinckii NCIMB 8052	YP_001308901	M2c
42_M2c	Clostridium botulinum E3 str. Alaska E43	YP_001920992	M2c
43_M2c	Clostridium bartlettii DSM 16795	ZP_02210839	M2c
44_M2c	Clostridium phytofermentans ISDg	YP_001559163	M2c
45_TRM3	Clostridium bartlettii DSM 16795	ZP_02210685	TR(M3)
46_TRM3	Clostridium difficile 630	YP_001089927	TR(M3)
47_TRM3	Clostridium bartlettii DSM 16795	ZP_02212112	TR(M3)
48_TRM3	Alistipes putredinis DSM 17216	ZP_02424371	TR(M3)
49_TRM3	Desulfotomaculum reducens MI-1	YP_001114615	TR(M3)
50_TRM3	Clostridium carboxidivorans P7	ZP_05391260	TR(M3)
51_TRM3	Anaerococcus hydrogenalis DSM 7454	ZP_03305079	TR(M3)
52_TRM3	Clostridium cellulovorans 743B	ZP_04805479	TR(M3)
53_TRM3	Clostridium novyi NT	YP_877778	TR(M3)
54_TRM3	Clostridium sporogenes ATCC 15579	ZP_02996025	TR(M3)
55_TRM3	Clostridium carboxidivorans P7	ZP_05393708	TR(M3)
56_TRM3	Clostridium botulinum A3 str. Loch Maree	YP_001787172	TR(M3)
57_ThermM	Thermotoga neapolitana DSM 4359	YP_002534027	ThermoMon
58_ThermM	Thermotoga maritima MSB8	NP_228016	ThermoMon
59_DM3	Clostridium hiranonis DSM 13275	ZP_03292845	D(M3)
60_DM3	Clostridium botulinum E3 str. Alaska E43	YP_001921030	D(M3)
61_DM3	Bacteroides pectinophilus ATCC 43243	ZP_03462801	D(M3)
62_DM3	Anaerostipes caccae DSM 14662	ZP_02417588	D(M3)
63_DM3	Clostridium sp. SS2/1	ZP_02440568	D(M3)
64_DM3	Clostridium nexile DSM 1787	ZP_03288284	D(M3)
65_DM3	Dorea longicatena DSM 13814	ZP_01996214	D(M3)
66_DM3	Dorea formicigenerans ATCC 27755	ZP_02234450	D(M3)
67_TRM3	Dorea formicigenerans ATCC 27755	ZP_02234883	TR(M3)
68_TRM3	Clostridium bolteae ATCC BAA-613	ZP_02089736	TR(M3)
69_TRM3	Ruminococcus obeum ATCC 29174	ZP_01965473	TR(M3)
70_TRM3	Clostridium sp. L2-50	ZP_02074529	TR(M3)
71_TRM3	Anaerostipes caccae DSM 14662	ZP_02419016	TR(M3)
72_TRM3	Ruminococcus lactaris ATCC 29176	ZP_03166398	TR(M3)
73_TRM3	Alkaliphilus oremlandii OhILAs	YP_001512533	TR(M3)
74_TRM3	Clostridium cellulolyticum H10	YP_002506620	TR(M3)
75_TRM3	Clostridium phytofermentans ISDg	YP_001557216	TR(M3)
76_TRM3	Clostridium butyricum 5521	ZP_02948973	TR(M3)
77_TRM3	Clostridium beijerinckii NCIMB 8052	YP_001311176	TR(M3)
78_TRM3	Clostridium botulinum B str. Eklund 17B	YP_001886496	TR(M3)
79_ThermT	Thermosipho melanesiensis BI429	YP_001305742	Thermotogae, trimeric
80_ThermT	Thermosipho africanus TCF52B	YP_002334590	Thermotogae, trimeric
81_M3aP	Clostridium bolteae ATCC BAA-613	ZP_02082663	M3a'
82_M3aP	Pseudoflavonifractor capillosus ATCC 29799	ZP_02035603	M3a'
83_M3aP	Eubacterium biforme DSM 3989	ZP_03489633	M3a'
84_M3aP	Clostridium spiroforme DSM 1552	ZP_02867943	M3a'
85_M3aP	Clostridium ramosum DSM 1402	ZP_02428761	M3a'
86_M3aP	Anaerostipes caccae DSM 14662	ZP_02421004	M3a'
87_M3aP	Clostridium sp. SS2/1	ZP_02438749	M3a'
88_M3aP	Ruminococcus torques ATCC 27756	ZP_01967385	M3a'
89_M3aP	Clostridium nexile DSM 1787	ZP_03290755	M3a'
90_M3aP	Clostridium scindens ATCC 35704	ZP_02430229	M3a'
91_M3aP	Dorea longicatena DSM 13814	ZP_01994466	M3a'
92_M2a	Clostridium kluyveri DSM 555	YP_001393559	M2a
93_M2a	Clostridium carboxidivorans P7	ZP_05390990	M2a
94_M2a	Clostridium botulinum A3 str. Loch Maree	YP_001788890	M2a
95_M2a	Clostridium sporogenes ATCC 15579	ZP_02993941	M2a
96_M2a	Clostridium tetani E88	NP_780897	M2a
97_M2a	Clostridium acetobutylicum ATCC 824	NP_349825	M2a
98_M2a	Clostridium perfringens ATCC 13124	YP_694731	M2a
99_M2a	Clostridium beijerinckii NCIMB 8052	YP_001309028	M2a
100_M2a	Clostridium botulinum B str. Eklund 17B	YP_001885900	M2a
101_M2a	Clostridium butyricum 5521	ZP_02951109	M2a
102_M2a	Clostridium novyi NT	YP_877103	M2a
103_M2a	Clostridium difficile 630	YP_001089774	M2a
104_M2a	Desulfitobacterium hafniense Y51	YP_517036	M2a
105_M2a	Clostridium leptum DSM 753	ZP_02081315	M2a
106_M2a	Clostridium nexile DSM 1787	ZP_03288257	M2a
107_M2a	Clostridium scindens ATCC 35704	ZP_02432701	M2a
108_M2a	Clostridium hylemonae DSM 15053	ZP_03778211	M2a
109_M3a	Clostridium bolteae ATCC BAA-613	ZP_02088079	M3a
110_M3a	Clostridium asparagiforme DSM 15981	ZP_03760911	M3a
111_M3a	Clostridium hathewayi DSM 13479	ZP_06111989	M3a
112_M3a	Clostridium sp. SS2/1	ZP_02439799	M3a
113_M3a	Clostridium sp. L2-50	ZP_02075337	M3a
114_M3a	Clostridium phytofermentans ISDg	YP_001557219	M3a
115_M3a	Clostridium leptum DSM 753	ZP_02080485	M3a
116_M3a	Clostridium methylpentosum DSM 5476	ZP_03705331	M3a
117_M3a	Heliobacterium modesticaldum Ice1	YP_001681153	M3a
118_M3a	Clostridium perfringens ATCC 13124	YP_697264	M3a
119_M3a	Clostridium sporogenes ATCC 15579	ZP_02993254	M3a
120_M3a	Clostridium botulinum A3 str. Loch Maree	YP_001788618	M3a
121_M3a	Clostridium novyi NT	YP_878935	M3a
122_M3a	Clostridium tetani E88	NP_782947	M3a
123_M3a	Clostridium difficile 630	YP_001087367	M3a
124_M3a	Clostridium difficile 630	YP_001087368	M3a
125_M3a	Clostridium hiranonis DSM 13275	ZP_03292196	M3a
126_M3a	Clostridium botulinum B str. Eklund 17B	YP_001884615	M3a
127_M3a	Clostridium butyricum 5521	ZP_02950663	M3a
128_M3a	Clostridium beijerinckii NCIMB 8052	YP_001307471	M3a
129_DM2f	Thermotoga lettingae TMO	YP_001470586	D(M2f)
130_DM2f	Thermosipho africanus TCF52B	YP_002334586	D(M2f)
131_DM2f	Clostridium botulinum A3 str. Loch Maree	YP_001787152	D(M2f)
132_DM2f	Clostridium sporogenes ATCC 15579	ZP_02996048	D(M2f)
133_DM2f	Clostridium carboxidivorans P7	ZP_05390529	D(M2f)
134_M2f	Clostridium botulinum A3 str. Loch Maree	YP_001787154	M2f
135_M2f	Clostridium sporogenes ATCC 15579	ZP_02996046	M2f
136_DM2f	Alkaliphilus metalliredigens QYMF	YP_001321808	D(M2f)
137_DM2f	Natranaerobius thermophilus JW/NM-WN-LF	YP_001917012	D(M2f)
138_DM2f	Holdemania filiformis DSM 12042	ZP_03635393	D(M2f)
139_DM2f	Clostridium thermocellum ATCC 27405	YP_001036857	D(M2f)
140_DM2f	Pseudoflavonifractor capillosus ATCC 29799	ZP_02038635	D(M2f)
141_DM2f	Clostridium leptum DSM 753	ZP_02080483	D(M2f)
142_DM2f	Clostridium hylemonae DSM 15053	ZP_03777938	D(M2f)
143_M2f	Clostridium nexile DSM 1787	ZP_03290961	M2f
144_DM2f	Ruminococcus torques ATCC 27756	ZP_01966801	D(M2f)
145_M2f	Clostridium phytofermentans ISDg	YP_001557221	M2f
146_DM2f	Clostridium hathewayi DSM 13479	ZP_06111991	D(M2f)
147_DM2f	Clostridium asparagiforme DSM 15981	ZP_03760913	D(M2f)
148_DM2f	Clostridium bolteae ATCC BAA-613	ZP_02088081	D(M2f)
149_M1	Volvox carteri f. nagariensis	XP_002948487	M1
150_M1	Chlamydomonas reinhardtii	XP_001693376	M1
151_M1	Chlamydomonas reinhardtii	XP_001694503	M1
152_M1	Chlorella fusca	CAC83291	M1
153_M1	Acutodesmus obliquus	CAC34419	M1
154_M1	Chlamydomonas moewusii	AAT90438	M1
155_M1	Volvox carteri f. nagariensis	XP_002948483	M1
156_TRM3	Spirochaeta thermophila DSM 6192	YP_003873858	TR(M3)
157_TRM3	Spirochaeta smaragdinae DSM 11293	YP_003802215	TR(M3)
159_TRM3	Thermosediminibacter oceani DSM 16646	YP_003825089	TR(M3)
160_M3	Anaerophaga thermohalophila	WP_010417740	M3
161_TRM3	Anaerophaga thermohalophila	WP_016776770	TR(M3)
162_TRM3	Spirochaeta alkalica	WP_018525843	TR(M3)
163_TRM3	Spirochaeta thermophila DSM 6578	YP_006044637	TR(M3)
164_TRM3	Spirochaeta thermophila	YP_006045487	TR(M3)
165_TRM3	Spirochaeta alkalica	WP_020614051	TR(M3)
166_TRM3	Spirochaeta bajacaliforniensis	WP_020614051	TR(M3)
167_TRM3	Aminomonas paucivorans	WP_006299828	TR(M3)
168_TRM3	Omnitrophica bacterium SCGC AAA252-B19	WP_020257317	TR(M3)
169_TRM3	Odoribacter	WP_009135591	TR(M3)
170_TRM3	Proteiniphilum acetatigenes	WP_019541397	TR(M3)
171_TRM3	Anaerophaga thermohalophila	WP_010417702	TR(M3)
172_TRM3	Halanaerobium hydrogeniformans	YP_003995541	TR(M3)
173_TRM3	Clostridium stercorarium subsp. stercorarium DSM 8532	YP_007372552	TR(M3)
174_TRM3	Clostridium papyrosolvens	WP_020815562	TR(M3)
175_TRM3	Hydrogenedentes bacterium JGI 0000039-J10	WP_018200888	TR(M3)
176_M3	Desulfotomaculum kuznetsovii DSM 6115	YP_004516391	M3
177_TRM3	Desulfotomaculum kuznetsovii DSM 6115	YP_004517644	TR(M3)
178_TRM3	Mahella australiensis 50-1 BON	YP_004463270	TR(M3)
179_TRM3	Holophaga foetida	WP_005033810	TR(M3)
180_TRM3	Bacteroides pyogenes	WP_021646890	TR(M3)
183_TRM3	Spirochaeta bajacaliforniensis	WP_020611343	TR(M3)
184_ThermM	Thermotoga thermarum DSM 5069	YP_004659294	Thermotogae, monomeric
185_TRM3	Marinilabilia salmonicolor	WP_010663850	TR(M3)
186_TRM3	Bacteroides salyersiae (WP_007481096)	WP_007481096	TR(M3)
188_TRM3	Odoribacter splanchnicus DSM 220712	YP_004251473	TR(M3)
189_TRM3	Desulfotomaculum kuznetsovii DSM 6115	YP_004518238	TR(M3)
190_TRM3	Spirochaeta alkalica	WP_018525846	TR(M3)
191_TRM3	Spirochaeta smaragdinae DSM 11293	YP_003805367	TR(M3)
192_ThermT	Thermophagus xiamenensis	WP_010527884	TR(M3)
193_TRM3	Melioribacter roseus P3M-2	YP_006528731	TR(M3)
194_ThermT	Thermotoga petrophila RKU-1	YP_001244957	Thermotogae, trimeric
195_ThermT	Thermotoga sp. RQ2	YP_001739346	Thermotogae, trimeric
196_ThermT	Thermotoga neapolitana DSM 4359	YP_002534609	Thermotogae, trimeric
197_ThermT	Thermotoga lettingae TMO	YP_001470582	Thermotogae, trimeric
198_ThermT	Thermotoga thermarum DSM 5069	YP_004659299	Thermotogae, trimeric
199_ThermT	Dictyoglomus thermophilum H-6-12	YP_002250294	Thermotogae, trimeric
200_ThermT	Fervidobacterium pennivorans DSM 9078	YP_005471095	Thermotogae, trimeric
201_ThermT	Fervidobacterium nodosum Rt17-B1	YP_001409749	Thermotogae, trimeric
202_ThermT	Dictyoglomus turgidum DSM 6724	YP_002352464	Thermotogae, trimeric
203_ThermT	Marinitoga piezophila KA3	YP_005096723	Thermotogae, trimeric
204_ThermT	Petrotoga mobilis SJ95	YP_001568190	Thermotogae, trimeric
205_TRM3	Tepidanaerobacter acetatoxydans Re1	YP_004461911	TR(M3)
206_TRM3	Clostridium thermocellum ATCC 27405	YP_001036861	TR(M3)
207_TRM3	Clostridium thermocellum ATCC 27405	YP_001036773	TR(M3)
a: Structural classes correspond with those generated by Calusinska et al., 2010 [19].
